# Supplementary material
Source: Springer Nature journal article supplement (https://www.springermedizin.de/resource/supplementary/12890_2014_606_MOESM1_ESM.pdf/9505442)

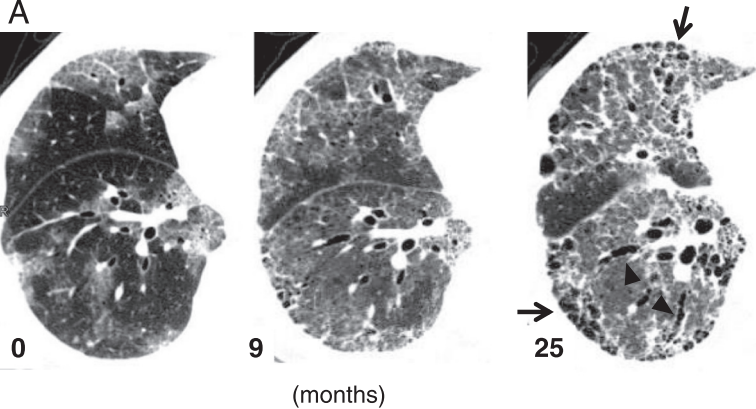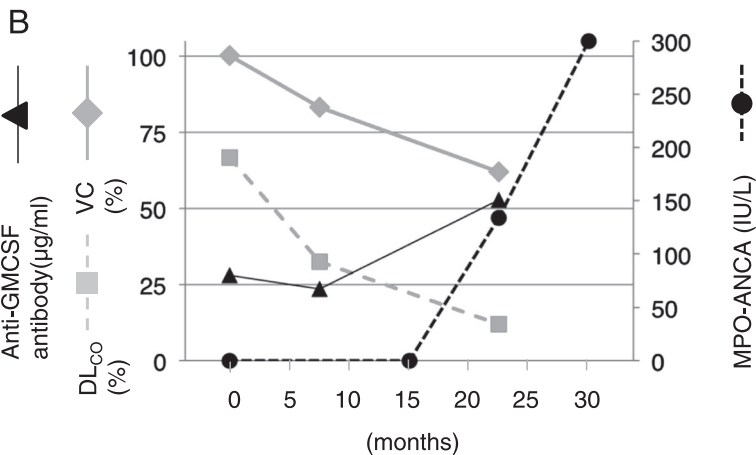

Supplement: MOESM1 [file 9505442]
